# Supplementary material for: Genomic surveillance of Canadian airport wastewater samples allows early detection of emerging SARS-CoV-2 lineages
Source: PubMed Central journal article supplement (PMC11532424; doi:10.1038/s41598-024-76925-6), 2024-11-03
Supplement: 41598_2024_76925_MOESM3_ESM.pdf [file 41598_2024_76925_MOESM3_ESM.pdf]

# Genomic Surveillance of Canadian Airport Wastewater Samples Allows Early Detection of Emerging SARS-CoV-2 Lineages

Alyssa K. Overton<sup>1\*</sup>, Jennifer J. Knapp<sup>1</sup>, Opeyemi U. Lawal<sup>2</sup>, Richard Gibson<sup>3</sup>, Anastasia A. Fedynak<sup>2</sup>, Adebowale I. Adebisi<sup>3</sup>, Brittany Maxwell<sup>4</sup>, Lydia Cheng<sup>5</sup>, Carina Bee<sup>7</sup>, Asim Qasim<sup>7</sup>, Kyle Atanas<sup>5</sup>, Mark Payne<sup>7</sup>, Rebecca Stuart<sup>6</sup>, Manon D. Fleury<sup>8</sup>, Natalie C. Knox<sup>8</sup>, Delaney Nash<sup>1,9</sup>, Yemurayi C. Hungwe<sup>1</sup>, Samran R. Prasla<sup>1</sup>, Hannifer Ho<sup>1</sup>, Simininuoluwa O. Agboola<sup>1</sup>, Su-Hyun Kwon<sup>1</sup>, Shiv Naik<sup>1</sup>, Valeria R. Parreira<sup>2</sup>, Fozia Rizvi<sup>2</sup>, Melinda J. Precious<sup>2</sup>, Steven Thomas<sup>4</sup>, Marcos Zambrano<sup>4</sup>, Vixey Fang<sup>7</sup>, Elaine Gilliland<sup>5</sup>, Monali Varia<sup>5</sup>, Maureen Horn<sup>5</sup>, Chrystal Landgraff<sup>8</sup>, Eric J. Arts<sup>3</sup>, Lawrence Goodridge<sup>2</sup>, Devan Becker<sup>10</sup>, Trevor C. Charles<sup>1,9\*</sup>

<sup>1</sup>University of Waterloo

<sup>2</sup>University of Guelph

<sup>3</sup>Western University

<sup>4</sup>Greater Toronto Airports Authority

<sup>5</sup>Regional Municipality of Peel

<sup>6</sup>Toronto Public Health

<sup>7</sup>York Region Public Health

<sup>8</sup>Public Health Agency of Canada

<sup>9</sup>Metagenom Bio Life Science Inc.

<sup>10</sup>Wilfrid Laurier University

**Supplementary Figures S1-S7, Supplementary table S3 and Supplementary methods**

# Supplementary Figures and Tables

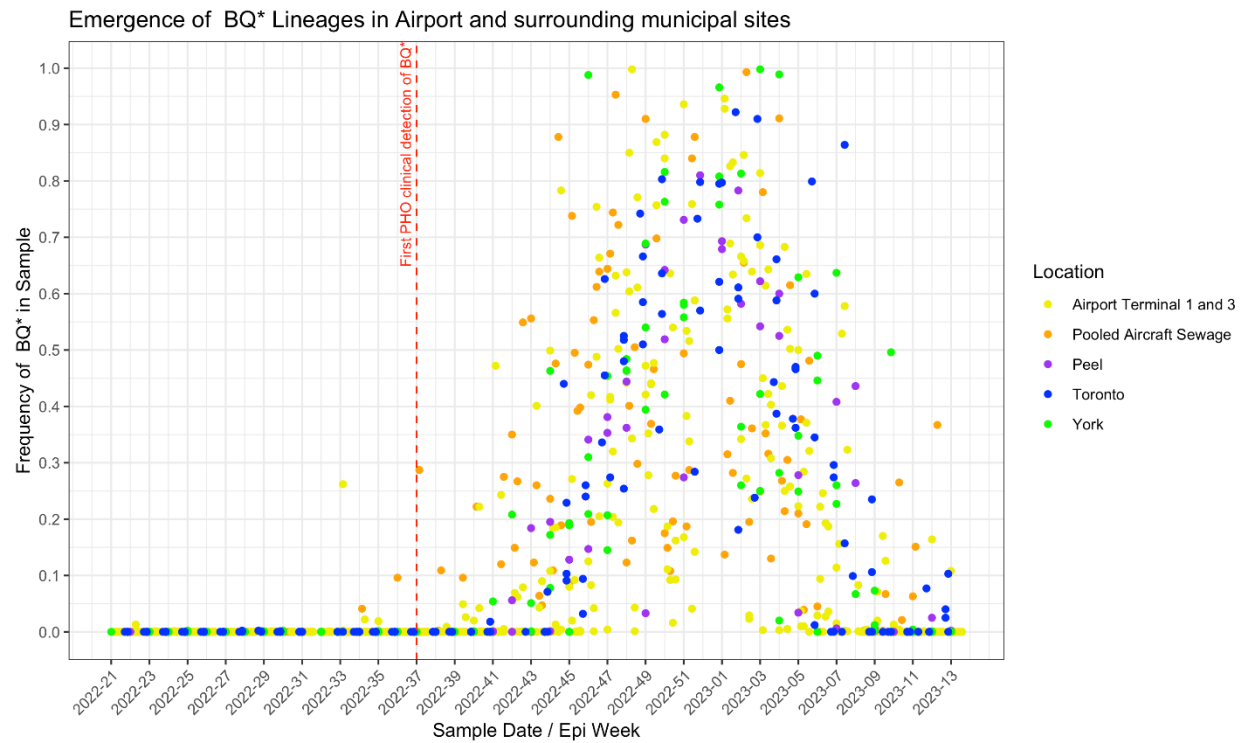

Supplementary Figure S1. Frequency of BQ\* lineages in WW samples from Toronto Pearson and surrounding municipal sites in Toronto, York, and Peel regions. Each point represents a single WW sample. Red dashed line represents the date of the first clinical sequence for BQ\* in Ontario from PHO reports.

### Emergence of BA.2.75\* Lineages in Airport and surrounding municipal sites

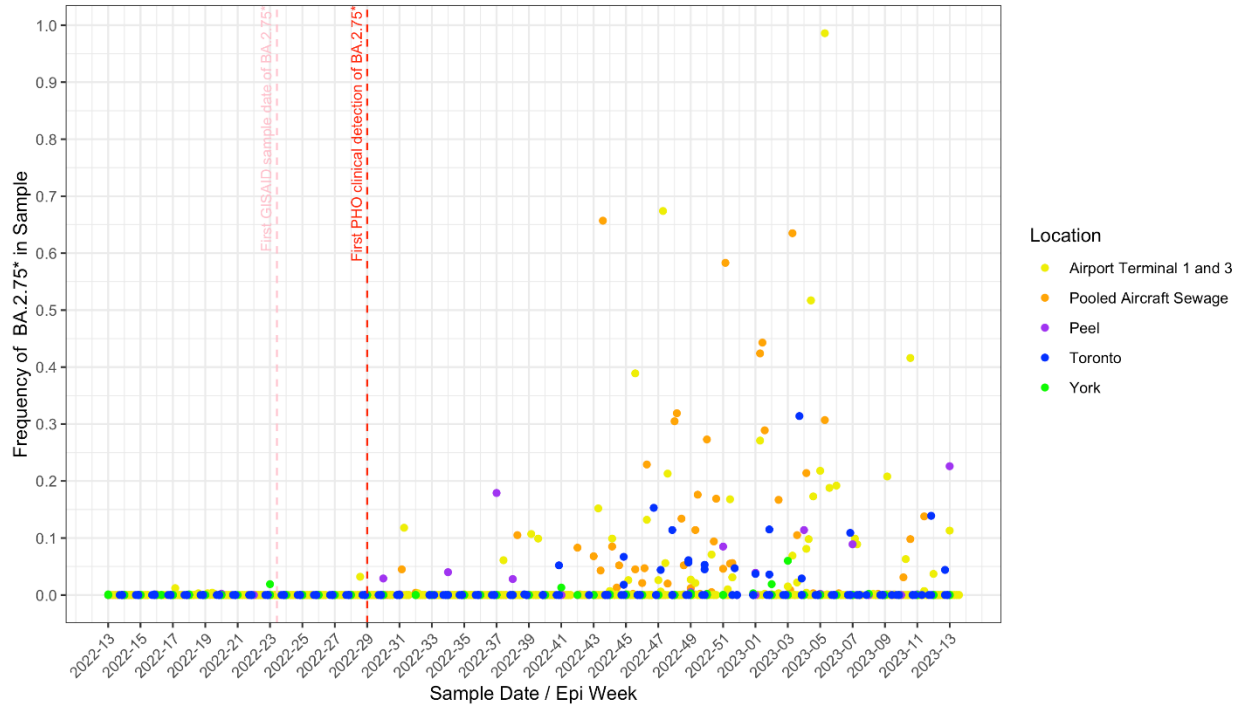

Supplementary Figure S2. Frequency of BA.2.75\* lineages in WW samples from Toronto Pearson and surrounding municipal sites in Toronto, York, and Peel regions. Each point represents a single WW sample. Red dashed line represents the date of the first clinical sequence for BA.2.75\* in Ontario from PHO reports. Pink dashed line represents the date of the first clinical sequence for BA.2.75 available in GISAIID.

### Emergence of BF\* Lineages in Airport and surrounding municipal sites

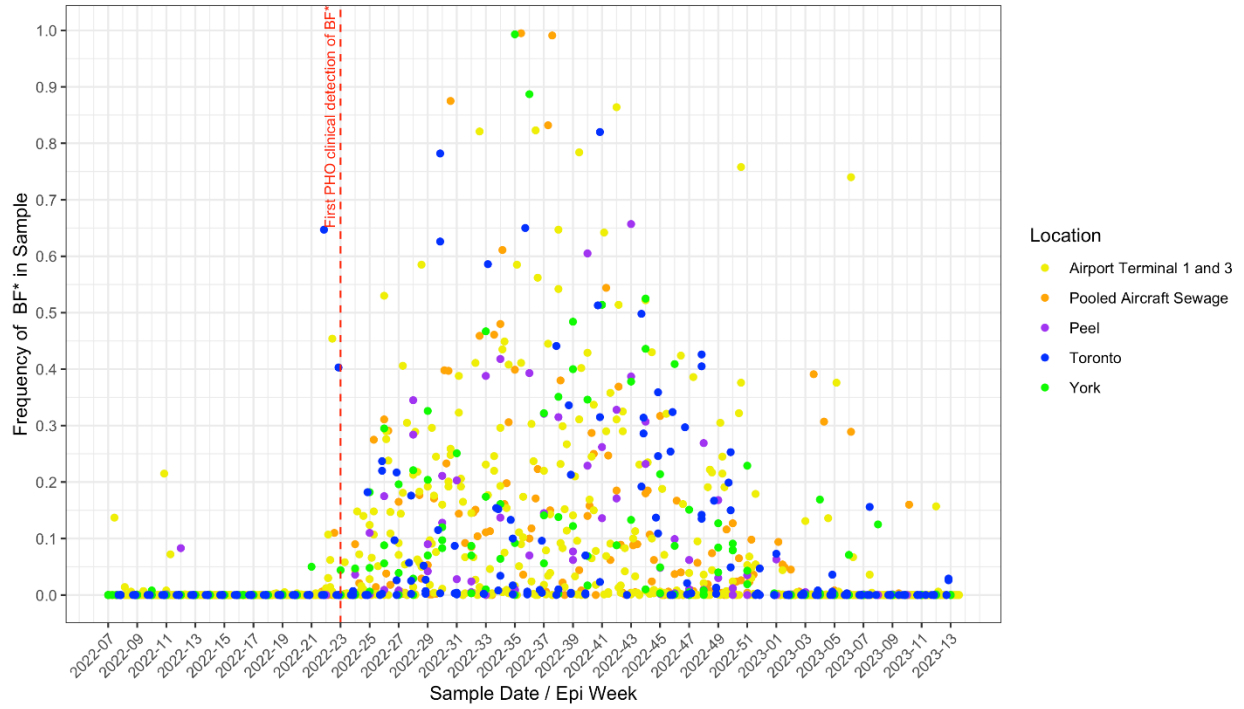

Supplementary Figure S3. Frequency of BF\* lineages in WW samples from Toronto Pearson and surrounding municipal sites in Toronto, York, and Peel regions. Each point represents a single WW sample. Red dashed line represents the date of the first clinical sequence of BF\* in Ontario from PHO reports.

### Emergence of XBB\* Lineages in Airport and surrounding municipal sites

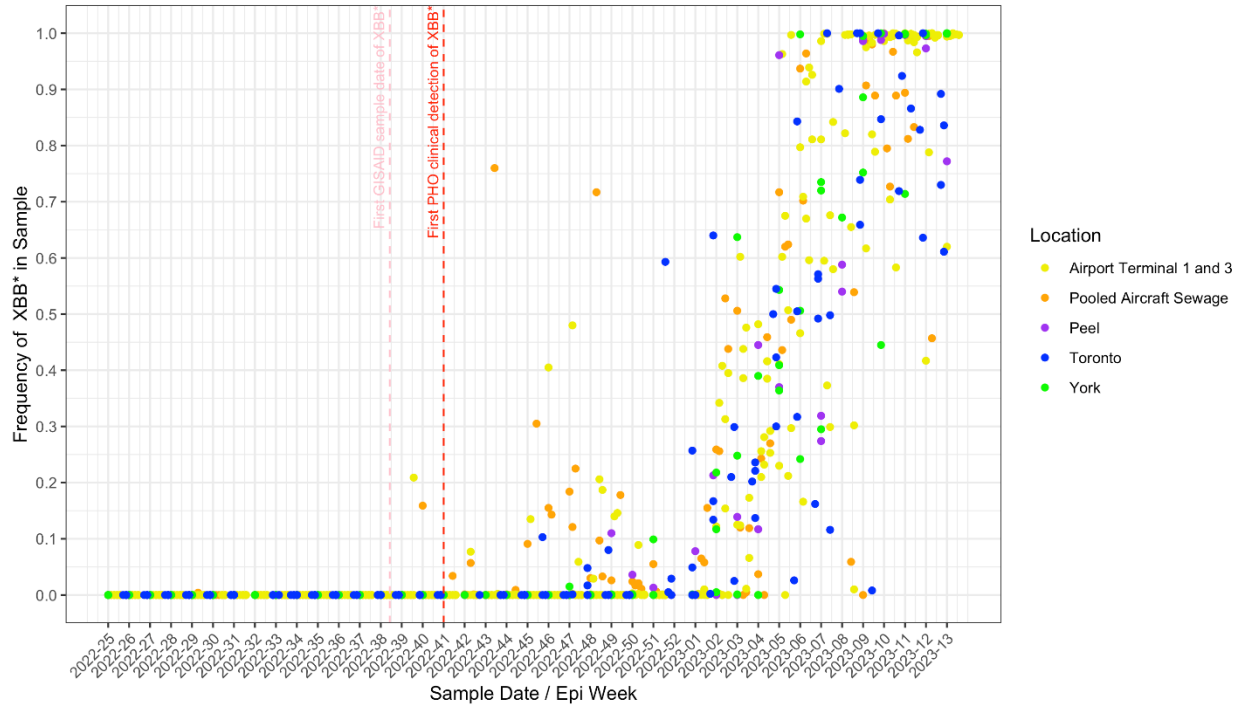

Supplementary Figure S4. Frequency of XBB\* lineages in WW samples from Toronto Pearson and surrounding municipal sites in Toronto, York, and Peel regions. Each point represents a single WW sample. Red dashed line represents the date of the first clinical sequence of XBB\* in Ontario from PHO reports. Pink dashed line represents the date of the first clinical sequence for XBB\* available in GISAID.

### Emergence of XBB.1.5\* Lineages in Airport and surrounding municipal sites

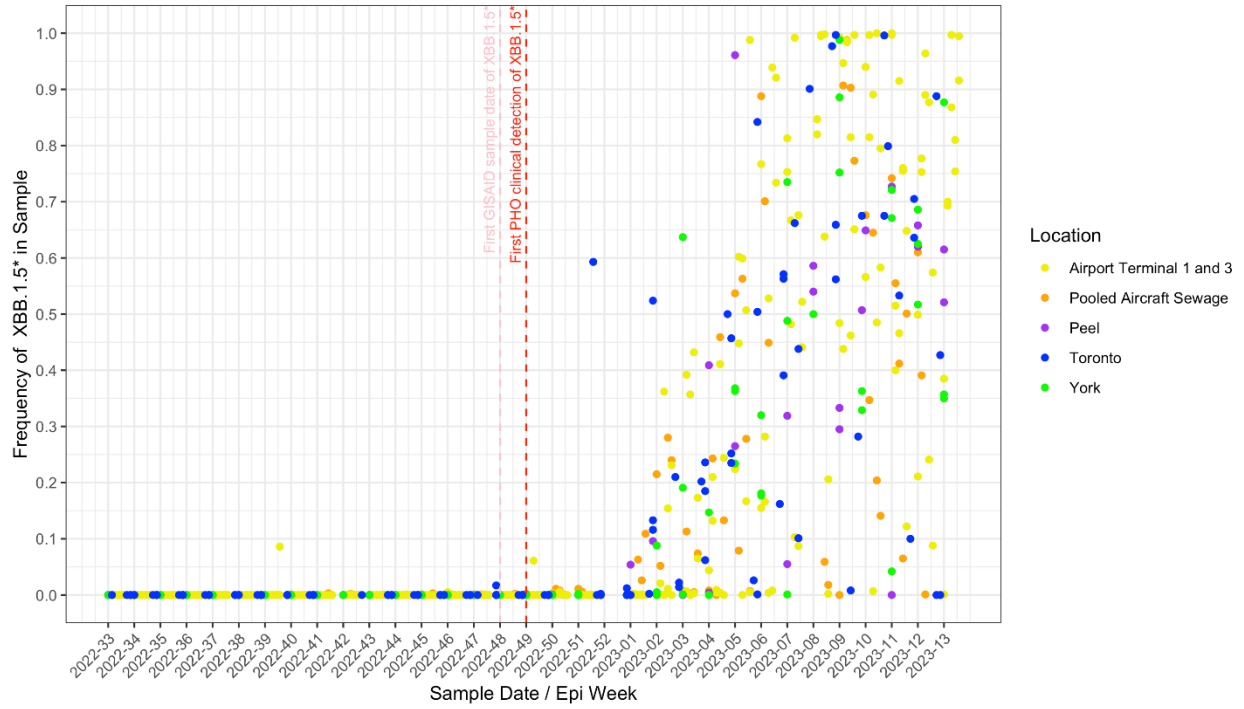

Supplementary Figure S5. Frequency of XBB.1.5\* lineages in WW samples from Toronto Pearson and surrounding municipal sites in Toronto, York, and Peel regions. Each point represents a single WW sample. Red dashed line represents the date of the first clinical sequence of XBB.1.5\* in Ontario from PHO reports. Pink dashed line represents the date of the first clinical sequence for XBB.1.5\* available in GISAID.

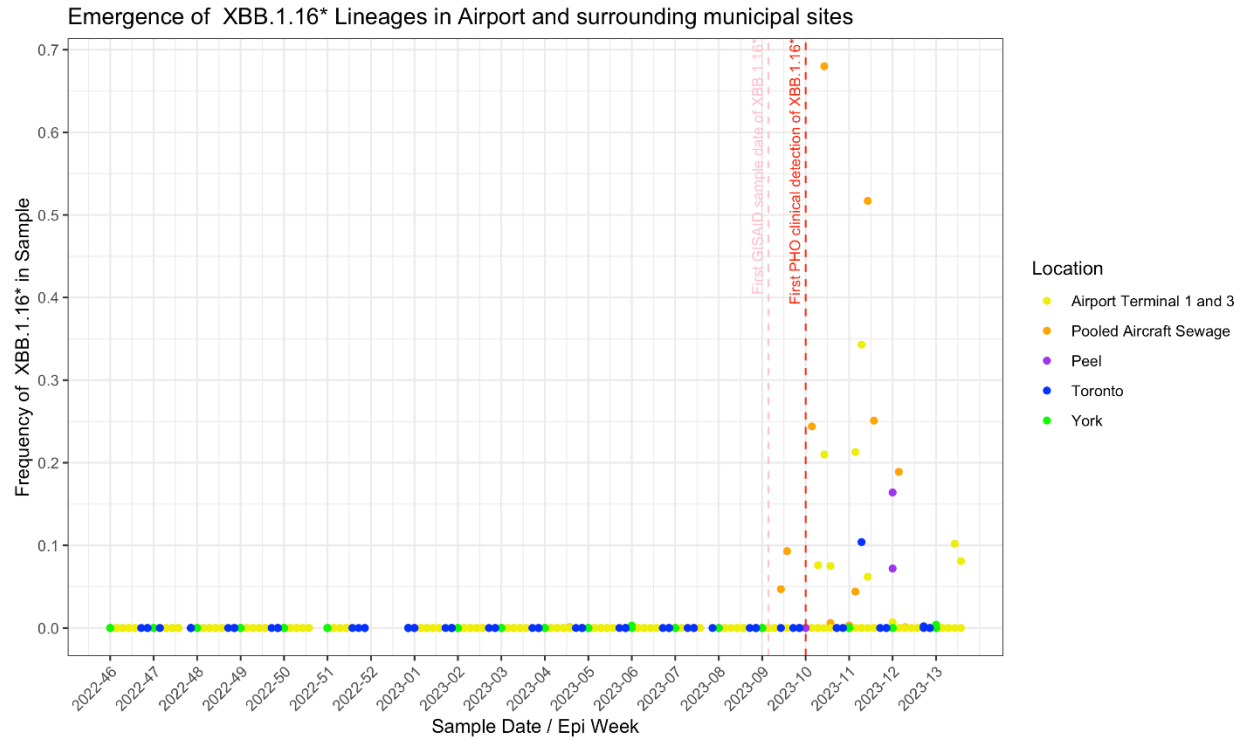

Supplementary Figure S6. Frequency of XBB.1.16\* lineages in WW samples from Toronto Pearson and surrounding municipal sites in Toronto, York, and Peel regions. Each point represents a single WW sample. Red dashed line represents the date of the first clinical sequence of XBB.1.16\* in Ontario from PHO reports. Pink dashed line represents the date of the first clinical sequence for XBB.1.16\* available in GISAID.

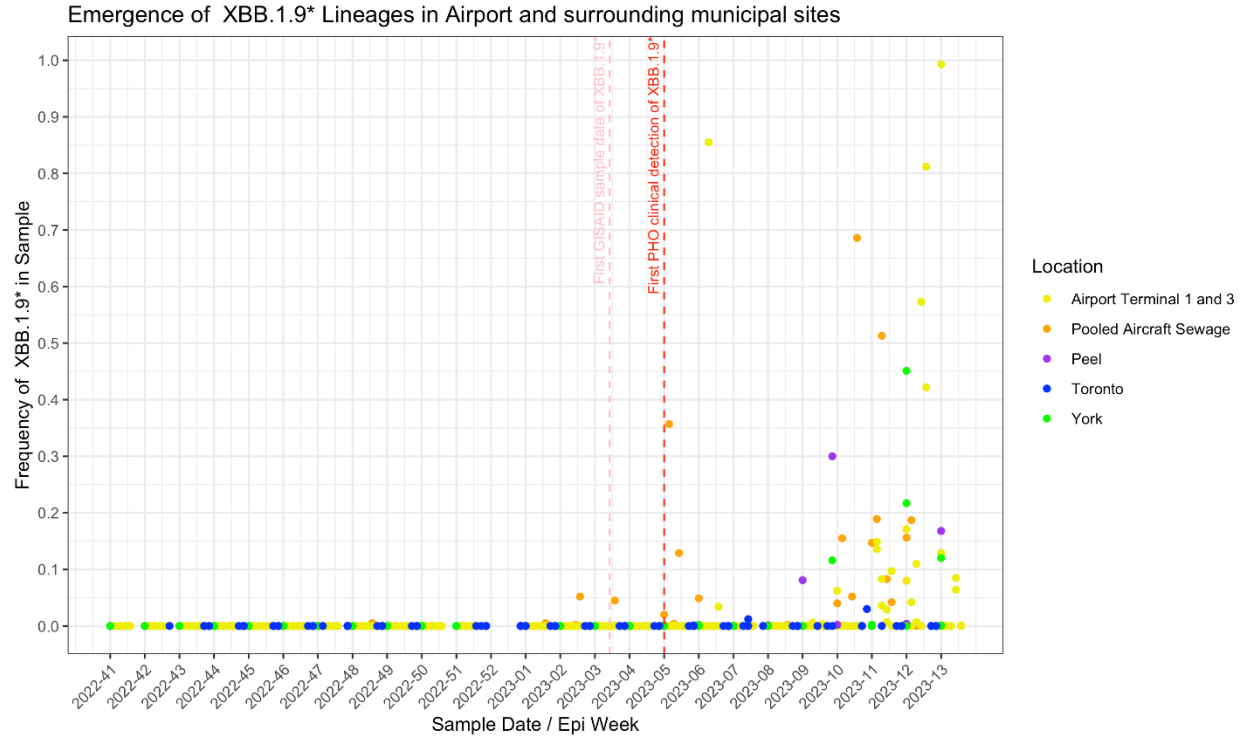

Supplementary Figure S7. Frequency of XBB.1.9\* lineages in WW samples from Toronto Pearson and surrounding municipal sites in Toronto, York, and Peel regions. Each point represents a single WW sample. Red dashed line represents the date of the first clinical sequence of XBB.1.9\* in Ontario from PHO reports. Pink dashed line represents the date of the first clinical sequence for XBB.1.9\* available in GISAID.

Supplementary Tables S1 and S2 are attached as spreadsheets



Supplementary Table S3: Breadth of Coverage Analysis

| Sample                               | SequencingPartner | AverageBOC  | Median BOC | st dev      |
|--------------------------------------|-------------------|-------------|------------|-------------|
| <b>Region</b>                        |                   |             |            |             |
| Terminal 1 and 3                     | Waterloo          | 76.55423729 | 82         | 18.38826839 |
| Pooled Aircraft                      | Guelph            | 80.87124464 | 96         | 27.17438024 |
| York                                 | Waterloo          | 71.46892655 | 76         | 20.65701603 |
| Peel                                 | Waterloo          | 77.07142857 | 83.5       | 19.06012982 |
| Toronto                              | Western           | 66.75618375 | 76         | 25.45294117 |
| <b>Terminal</b>                      |                   |             |            |             |
| Terminal 1                           |                   | 75.35932203 | 80         | 18.03216635 |
| Terminal 3                           |                   | 77.74915254 | 84         | 18.66124755 |
| <b>Pooled Aircraft Sample Method</b> |                   |             |            |             |
| Aircraft passive sampler             |                   | 73.07801418 | 90         | 30.11492665 |
| Aircraft auto sampler                |                   | 92.81521739 | 98         | 15.63714179 |
| <b>Municipal Sample Method</b>       |                   |             |            |             |
| Municipal Grab                       |                   | 74.45132743 | 79         | 19.93041    |
| Municipal Composite 24hr             |                   | 69.42917548 | 78         | 23.75998187 |
| <b>Sequencing Partner</b>            |                   |             |            |             |
|                                      | Waterloo          | 75.61659193 | 81         | 19.07687053 |
|                                      | Guelph            | 80.87124464 | 96         | 27.17438024 |
|                                      | Western           | 66.75618375 | 76         | 25.45294117 |

Table showing average, median and st dev of BOC > 10 data broken into different sample groups as indicated by sub-headers for comparison. All sequenced samples were included even if they were discarded from lineage calling analysis.

## Supplementary Methods

### Sum Frequencies for Lineages - Python

```
import pandas as pd
import json
```

```
# Load the alias key
```

```
with open('/Users/jennk/Documents/Data_Chales_Lab/paper_airport/alias_key.json', 'r') as f:
    alias_key = json.load(f)
```

```
# Load the CSV file
```

```
csv_file_path = '/Users/jennk/Documents/Data_Chales_Lab/paper_airport/all_samples_lineages.csv'
df = pd.read_csv(csv_file_path)
```

```

# Long form names for specified lineages
lineages_of_interest = {
    'BQ': 'B.1.1.529.5.3.1.1.1.1',
    'BA.2.75': 'B.1.1.529.2.75',
    'BF': 'B.1.1.529.5.2.1',
    'XBB': 'XBB', # Special handling required
    'XBB.1.5': 'XBB.1.5',
    'XBB.1.16': 'XBB.1.16',
    'XBB.1.9': 'XBB.1.9'
}

# Function to get all child lineages for a given lineage
def get_subset_keys(dictionary, start_string):
    return {key for key, value in dictionary.items() if isinstance(value, str) and
value.startswith(start_string) or isinstance(value, list) and any(isinstance(item, str) and
item.startswith(start_string) for item in value)}

lineage_results = {}

for lineage, start_string in lineages_of_interest.items():
    lineage_keys = get_subset_keys(alias_key, start_string)
    lineage_keys.add(lineage) # Include the lineage itself
    lineage_results[lineage] = lineage_keys

# Exclude XBF from BF lineage
lineage_results['BF'] = {key for key in lineage_results['BF'] if not key.startswith('XBF')}

# Initialize dictionary to store lineage columns
lineage_columns = {lineage: set() for lineage in lineage_results.keys()}

# Identify columns matching each lineage and its children
for lineage, child_keys in lineage_results.items():
    for col in df.columns:
        col_lineages = col.split(' or ')
        if all(any(child_key in lineage_part for child_key in child_keys) for lineage_part in col_lineages):
            lineage_columns[lineage].add(col)

# Debugging: print identified columns for each lineage
for lineage, columns in lineage_columns.items():
    print(f"{lineage}: {columns}")

# Function to sum columns for each lineage and round to 3 decimal places
def sum_lineage_columns(df, lineage, columns):
    if columns:
        df[f'{lineage}_summary'] = df[list(columns)].sum(axis=1).round(3)

```

```

else:
  df[f'{lineage}_summary'] = 0

# Sum the columns and create summary columns
for lineage, columns in lineage_columns.items():
  sum_lineage_columns(df, lineage, columns)

# Reorder columns to insert summary columns after 'BreadthOfCoverage'
summary_columns = [f'{lineage}_summary' for lineage in lineages_of_interest]
cols = list(df.columns)
for col in summary_columns:
  cols.insert(3, cols.pop(cols.index(col)))

df = df[cols]

# Save the modified DataFrame back to a CSV file
output_csv_file_path =
'/Users/jennk/Documents/Data_Chales_Lab/paper_airport/summary_all_samples_lineages.csv'
df.to_csv(output_csv_file_path, index=False)

```

## Data Preparation for Plots

```

suppressPackageStartupMessages({
  library(readxl)
  library(dplyr)
  library(tidyr)
  library(ggplot2)
  theme_set(theme_bw())
  library(lubridate)
})
### NOT RUN
# Processing script to remove unused columns and
# give columns standardized names.

# This was run once then copied here for posterity.

air1 <- read_excel("summary_all_samples_lineages.xlsx")
air <- air1[, 1:10]
names(air) <- c("Sample_Name", "Sample_Date", "Breadth_of_Coverage",
  "XBB.1.9*", "XBB.1.16*", "XBB.1.5*",
  "XBB*", "BF*", "BA.2.75*", "BQ*")

air <- air %>%
  mutate(Location = gsub("(20\\d+)|(-\\d+)", "", Sample_Name)) %>%
  mutate(Location = ifelse(

```

```

Location %in% c("Ashbridges", "AshbridgesBay", "AshbridgeBay"),
yes = "Ashbridges",
no = ifelse(
  Location %in% c("HighlandCreek", "Highland", "HighlandCR"),
  yes = "HighlandCreek",
  no = Location)
)) %>%
mutate(Group = case_when(
  Location %in% c("Humber", "Ashbridges", "HighlandCreek", "NorthToronto") ~ "Toronto",
  Location %in% c("As", "At") ~ "Pooled Aircraft Sewage",
  Location %in% c("A1", "A3") ~ "Airport Terminal 1 and 3",
  Location %in% c("P1", "P2") ~ "Peel",
  Location %in% c("Y1", "Y5", "Y6") ~ "York",
  TRUE ~ "Devan Missed One"
))
air <- select(air, -Sample_Name) %>%
pivot_longer(cols = !c(Group, Location, Sample_Date, Breadth_of_Coverage),
  values_to = "Frequency", names_to = "Lineage") %>%
mutate(Sample_Date = ymd(Sample_Date),
  Frequency = ifelse(Frequency > 1, 1, Frequency))
write.csv(air, file = "summary_all_samples_clean.csv")
rm(air1)
### END NOT RUN
air <- read.csv("summary_all_samples_clean.csv") %>%
  filter(Breadth_of_Coverage >= 20)

gisaid <- data.frame(
  Lineage = c("BQ*", "BA.2.75*", "BF*", "XBB*",
    "XBB.1.5*", "XBB.1.16*", "XBB.1.9*"),
  Gisaid_Sample = ymd(c("", "2022-06-09", "", "2022-09-22",
    "2022-11-28", "2023-02-28", "2023-01-19")),
  Gisaid_Report = ymd(c("", "2022-06-21", "", "2022-10-03",
    "2022-12-12", "2023-04-24", ""))
)
pho <- data.frame(
  Lineage = c("BQ*", "BA.2.75*", "BF*", "XBB*",
    "XBB.1.5*", "XBB.1.16*", "XBB.1.9*"),
  Pho_Week = c(37, 29, 23, 41,
    49, 52 + 10, 52 + 5) + 52
)

date_seq <- seq(ymd("2022-01-01"), ymd("2024-12-31"), 1)
epiweeks <- data.frame(
  EpiWeek = epiweek(date_seq) + 52 * (year(date_seq) - 2021),

```

```

date = date_seq)
epiweeks <- epiweeks[epiweeks$EpiWeek %in% pho$Pho_Week, ]

air2 <- left_join(air, gisaid, by = "Lineage") %>%
  mutate(Lead_Sample = as.numeric(ymd(Sample_Date) - ymd(Gisaid_Sample)),
         Lead_Report = as.numeric(ymd(Sample_Date) - ymd(Gisaid_Report)),
         Epi_Week = 52 * (year(Sample_Date) - 2021) + epiweek(Sample_Date)) %>%
  left_join(pho, by = "Lineage") %>%
  mutate(Lead_Epi = Epi_Week - Pho_Week) %>%
  mutate(Detection = Frequency >= 0.01) %>%
  mutate(Group = ordered(Group, levels = levels(factor(Group))[c(1,3,4,5,2)]))

air4 <- air2 %>%
  filter(Lead_Epi > -17) %>%
  group_by(Lineage, Group) %>%
  arrange(Sample_Date) %>%
  mutate(`Freq >= 0.01` = cumsum(Frequency > 0.01),
         `Freq >= 0.05` = cumsum(Frequency > 0.05)) %>%
  pivot_longer(cols = c(`Freq >= 0.01`, `Freq >= 0.05`))

air5 <- air2 %>%
  filter(Lead_Epi > -17) %>%
  group_by(Lineage, Group) %>%
  arrange(Sample_Date) %>%
  mutate(`Freq >= 0.01` = cumsum(Frequency > 0.01),
         `Freq >= 0.05` = cumsum(Frequency > 0.05)) %>%
  pivot_longer(cols = c(`Freq >= 0.01`, `Freq >= 0.05`))
# https://stackoverflow.com/questions/54438495/shift-legend-into-empty-facets-of-a-faceted-plot-in-ggplot2
shift_legend3 <- function(p) {
  pnls <- cowplot::plot_to_gtable(p) %>% gtable::gtable_filter("panel") %>%
    with(setNames(grobs, layout$name)) %>%
    purrr::keep(~identical(.x, zeroGrob()))

  if (length(pnls) == 0) stop("No empty facets in the plot")

  lemon::reposition_legend(p, "center",
                           panel = names(pnls))
}

```

## Frequency Plots (log scale)

```

g <- ggplot(filter(air2, Lead_Epi > -17, Lead_Epi < 10, Frequency > 0)) +
  theme_bw() +

```

```

aes(x = Lead_Epi, y = Frequency, colour = Group) +
geom_point(size = 1, mapping = aes(alpha = Detection)) +
scale_alpha_manual(values = c(0.4, 1)) +
facet_wrap(~ Lineage, ncol = 2) +
geom_vline(xintercept = 0) +
geom_hline(yintercept = c(0.01), col = "grey", linetype = 2) +
geom_hline(yintercept = c(0.05), col = "grey", linetype = 2) +
labs(x = "Epiweeks to/from First Clinical Case",
     y = "Relative Demixing Frequency of Lineage from Alcov (log scale)",
     title = "", colour = NULL) +
guides(alpha = "none") +
scale_y_log10() +
scale_colour_brewer(palette = "Dark2")
shift_legend3(g)

```

## Cumulative Plots

```

g <- filter(air4, Lead_Epi > -20, Lead_Epi < 10) %>%
  mutate(name = ordered(name, levels = rev(levels(factor(name)))))) %>%
  ggplot() +
  theme_bw() +
  geom_vline(xintercept = 0, colour = "darkgreen", linewidth = 1.25) +
  aes(x = Lead_Epi, y = value, colour = Group, linetype = name) +
  geom_step() +
  facet_wrap(~ Lineage, ncol = 2) +
  coord_cartesian(ylim = c(0, 10)) +
  labs(x = "Epiweeks Since First Clinical Case",
       y = "Cumulative Detections",
       linetype = "Detection Threshold",
       colour = "Location") +
  scale_y_continuous(minor_breaks = 0:10, breaks = seq(0, 10, 2)) +
  scale_x_continuous(minor_breaks = -20:20, breaks = seq(-20, 20, 2)) +
  scale_colour_brewer(palette = "Dark2") +
  theme(legend.box = "horizontal")

```

```
shift_legend3(g)
```

## Summary Statistics

```

air4 %>%
  filter(Lead_Epi > -20, value == 1) %>%
  mutate(Detection_Threshold = case_when(
    Detection ~ 0.01,
    TRUE ~ 0.05
  )) %>%
  group_by(Group, Detection_Threshold) %>%
  summarise(
    earliest_first_date = min(Lead_Epi),

```

```

    mean_first_date = mean(Lead_Epi),
    sd_first_date = sd(Lead_Epi)
  ) %>%
  arrange(Group, Detection_Threshold) %>%
  knitr::kable()

```

## Summary Statistics GISAID

```

air5 %>%
  filter(Lead_Epi > -20, value == 1) %>%
  mutate(Detection_Threshold = case_when(
    Detection ~ 0.01,
    TRUE ~ 0.05
  )) %>%
  group_by(Group, Detection_Threshold) %>%
  summarise(
    earliest_first_date = min(Lead_Sample, na.rm = TRUE),
    mean_first_date = mean(Lead_Sample, na.rm = TRUE),
    sd_first_date = sd(Lead_Sample, na.rm = TRUE)
  ) %>%
  arrange(Group, Detection_Threshold) %>%
  knitr::kable()

```

## Supplementary Scatter Plots - R

```

suppressPackageStartupMessages({
  library(readxl)
  library(dplyr)
  library(magrittr)
  library(tidyr)
  library(ggplot2)
  theme_set(theme_bw())
  library(lubridate)
  library(epitools)
})

air <- read.csv("summary_all_samples_clean.csv") %>%
  filter(Breadth_of_Coverage >= 20)

gisaid <- data.frame(
  Lineage = c("BQ*", "BA.2.75*", "BF*", "XBB*",
    "XBB.1.5*", "XBB.1.16*", "XBB.1.9*"),
  Gisaid_Sample = ymd(c("", "2022-06-09", "", "2022-09-22",
    "2022-11-28", "2023-02-28", "2023-01-19")),
  Gisaid_Report = ymd(c("", "2022-06-21", "", "2022-10-03",
    "2022-12-12", "2023-04-24", ""))
)

```

```

pho <- data.frame(
  Lineage = c("BQ*", "BA.2.75*", "BF*", "XBB*",
             "XBB.1.5*", "XBB.1.16*", "XBB.1.9*"),
  Pho_Week = c(37, 29, 23, 41,
              49, 10, 5),
  Year = c(2022, 2022, 2022, 2022, 2022, 2023, 2023)
)

# Convert Pho_Week and Year to dates
pho <- pho %>%
  mutate(Pho_Date = as.Date(paste(Year, Pho_Week, 1, sep = "-"), "%Y-%U-%u"))

# Ensure Sample_Date is a Date object and add Epiweek and Year columns
air <- air %>%
  mutate(Sample_Date = as.Date(Sample_Date),
         Epiweek = as.numeric(as.week(Sample_Date)$week),
         Year = year(Sample_Date),
         Epiweek_Year = paste(Year, sprintf("%02d", as.numeric(Epiweek)), sep = "-"))

# Function to calculate start date 16 weeks before a given date
start_date <- function(date) {
  date - weeks(16)
}

# Define the end date
end_date <- ymd("2023-03-31")

# Unique lineages
lineages <- unique(air$Lineage)

# Loop through each lineage and create a scatter plot
for (lineage in lineages) {
  print(paste("Processing lineage:", lineage)) # Print the lineage being processed

  air_lineage <- air %>%
    filter(Lineage == lineage)

  # Get the first PHO clinical detection date for the current lineage
  first_pho_detection_date <- pho %>%
    filter(Lineage == lineage) %>%
    pull(Pho_Date)

  # Get the first GISAID clinical sample date for the current lineage
  first_gisaid_sample_date <- gisaid %>%
    filter(Lineage == lineage) %>%
    pull(Gisaid_Sample)
}

```



```

# Calculate the start date 16 weeks before the first clinical detection date
start_date_lineage <- start_date(first_pho_detection_date)

# Filter air_lineage based on the calculated start date and end date
air_lineage <- air_lineage %>%
  filter(Sample_Date >= start_date_lineage & Sample_Date <= end_date)

# Create breaks at weekly intervals
breaks <- seq(min(air_lineage$Sample_Date), max(air_lineage$Sample_Date), by = "week")

# Create labels for the breaks
labels <- paste(year(breaks), sprintf("%02d", as.numeric(as.week(breaks)$week)), sep = "-")

# Adjust breaks and labels for specific lineages
if (lineage %in% c("BQ*", "BA.2.75*", "BF*")) {
  breaks <- breaks[seq(1, length(breaks), by = 2)]
  labels <- labels[seq(1, length(labels), by = 2)]
}

# Define the order of legend labels
legend_order <- c("Airport Terminal 1 and 3", "Pooled Aircraft Sewage", "Peel", "Toronto", "York")

p <- ggplot(air_lineage,
  aes(x = Sample_Date, y = Frequency, color = Group)) +
  geom_point() +
  labs(title = paste("Emergence of ", lineage, "Lineages in Airport and surrounding municipal sites"),
    x = "Sample Date / Epi Week",
    y = paste("Frequency of ", lineage, "in Sample"),
    color = "Location") +
  scale_color_manual(values = c("Toronto" = "blue", "Peel" = "purple", "York" = "green",
    "Pooled Aircraft Sewage" = "orange", "Airport Terminal 1 and 3" = "yellow2"),
    limits = legend_order) +
  scale_x_date(breaks = breaks, labels = labels) +
  geom_vline(xintercept = first_pho_detection_date, linetype = "dashed", color = "red") +
  annotate("text", x = first_pho_detection_date, y = Inf, label = paste("First PHO clinical detection of",
lineage),
  angle = 90, vjust = -0.5, hjust = 1, color = "red", size = 3) +
  geom_vline(xintercept = first_gisaid_sample_date, linetype = "dashed", color = "pink") +
  annotate("text", x = first_gisaid_sample_date, y = Inf, label = paste("First GISAIID sample date of",
lineage),
  angle = 90, vjust = -0.5, hjust = 1, color = "pink", size = 3) +

  theme(axis.text.x = element_text(angle = 45, hjust = 1)) +
  scale_y_continuous(breaks = seq(0, max(air$Frequency, na.rm = TRUE), by = 0.1)) # Adjust y-axis
breaks

# Display plot
print(p)

```

```
# Save plot
ggsave(filename = paste0("scatter_plot_", lineage, ".png"), plot = p, width = 10, height = 6)
}
```

## S:R346T Plot – R

```
suppressPackageStartupMessages({
  library(readxl)
  library(dplyr)
  library(magrittr)
  library(tidyr)
  library(ggplot2)
  theme_set(theme_bw())
  library(lubridate)
  library(epitools)
})

airS1 <- read.csv("all_samples_SR346T_mutations.csv")
airS <- airS1[, 1:4]
names(airS) <- c("Sample_Name", "Sample_Date", "Breadth_of_Coverage",
  "S:R346T")

airS <- airS %>%
  mutate(Location = gsub("(20\\d+)|(-\\d+)", "", Sample_Name)) %>%
  mutate(Location = ifelse(
    Location %in% c("Ashbridges", "AshbridgesBay", "AshbridgeBay"),
    yes = "Ashbridges",
    no = ifelse(
      Location %in% c("HighlandCreek", "Highland", "HighlandCR"),
      yes = "HighlandCreek",
      no = Location)
  )) %>%
  mutate(Group = case_when(
    Location %in% c("Humber", "Ashbridges", "HighlandCreek", "NorthToronto") ~ "Toronto",
    Location %in% c("As", "At") ~ "Pooled Aircraft Sewage",
    Location %in% c("A1", "A3") ~ "Airport Terminal 1 and 3",
    Location %in% c("P1", "P2") ~ "Peel",
    Location %in% c("Y1", "Y5", "Y6") ~ "York",
    TRUE ~ "Devan Missed One"
  ))
airS <- select(airS, -Sample_Name) %>%
  pivot_longer(cols = !c(Group, Location, Sample_Date, Breadth_of_Coverage),
    values_to = "Frequency", names_to = "Mutation") %>%
  mutate(Sample_Date = ymd(Sample_Date),
    Frequency = ifelse(Frequency > 1, 1, Frequency))
write.csv(airS, file = "summary_all_samples_SR346T_clean.csv")
```

```

rm(airS1)

airS <- read.csv("summary_all_samples_clean.csv") %>%
  # Remove samples with less than 20% BOC and no coverage of S:R346T (Frequency = -1)
  filter(Breadth_of_Coverage >= 20 & Frequency >= 0)

# Ensure Sample_Date is a Date object and add Epiweek and Year columns
airS <- airS %>%
  mutate(Sample_Date = as.Date(Sample_Date),
         Epiweek = as.numeric(as.week(Sample_Date)$week),
         Year = year(Sample_Date),
         Epiweek_Year = paste(Year, sprintf("%02d", as.numeric(Epiweek)), sep = "-"))

# Define the start and end dates
start_date <- ymd("2022-04-01")
end_date <- ymd("2023-03-31")

# Filter airS based on the calculated start date and end date
airS <- airS %>%
  filter(Sample_Date >= start_date & Sample_Date <= end_date)

# Create breaks at weekly intervals
breaks <- seq(min(airS$Sample_Date), max(airS$Sample_Date), by = "week")

# Create labels for the breaks
labels <- paste(year(breaks), sprintf("%02d", as.numeric(as.week(breaks)$week)), sep = "-")

# Adjust breaks and labels for readability
breaks <- breaks[seq(1, length(breaks), by = 2)]
labels <- labels[seq(1, length(labels), by = 2)]

# Define the order of legend labels
legend_order <- c("Airport Terminal 1 and 3", "Pooled Aircraft Sewage", "Peel", "Toronto", "York")

p <- ggplot(airS,
  aes(x = Sample_Date, y = Frequency, color = Group)) +
  geom_point() +
  labs(title = paste("Emergence of S:R346T mutation in Airport and surrounding municipal sites"),
       x = "Sample Date / Epi Week",
       y = paste("Frequency of S:R346T in Sample"),
       color = "Location") +
  scale_color_manual(values = c("Toronto" = "blue", "Peel" = "purple", "York" = "green",
                                "Pooled Aircraft Sewage" = "orange", "Airport Terminal 1 and 3" = "yellow2"),
                    limits = legend_order) +
  scale_x_date(breaks = breaks, labels = labels) +
  theme(axis.text.x = element_text(angle = 45, hjust = 1)) +

```

```
scale_y_continuous(breaks = seq(0, max(airS$Frequency, na.rm = TRUE), by = 0.1)) # Adjust y-axis  
breaks
```

```
# Display plot  
print(p)
```

```
# Save plot  
ggsave(filename = paste0("scatter_plot_SR346T.png"), plot = p, width = 10, height = 6)
```
